# Supplementary material
Source: Research Square preprint supplement (doi:10.21203/rs.3.rs-9660726/v1)
Supplement: Supplementary file 1 [file 1dcb0875e70161ab73c0dd25.docx]

**Section 1: CT image acquisition parameters**

**At Center 1,** CT scans were performed using the SOMATOM Definition AS and Optima CT680 Series scanners. The acquisition parameters included the following: tube current, 190–320 or 87 mA; tube voltage, 120 kV; section thickness, 4.8 or 5 mm.

**At Center 2,** CT scans were conducted using the Brilliance 16 Air Series and GE Optima CT680 Expert scanners. The scanning parameters were as follows: axial mode, tube voltage, 120 kV; tube current, 133 or 300–304 mAs; scanning ranges from the skull base to the cranial roof, and section thickness, 5 or 6 mm.

**At Center3,** CT scans were conducted using a 64-row spiral CT scanner (SOMATOM Definition AS; Siemens Healthineers, Erlangen, Germany) and a 62-row spiral scanner (Optima CT620; GE Healthcare, Chicago, IL, United States). The scanning parameters included the following: axial mode; tube voltage, 120 kV; tube current ranging 250–300 mAs; scanning range extending from the skull base to the cranial roof; section thickness of 5 mm; reconstruction using the standard algorithm.

**Section 2: ICC calculation process**

Reader A performed ICH-ROI and PHE-ROI segmentation twice, with a one-month interval, to evaluate intra-observer agreement. Reader B segmented the 30 lesions once and used the extracted radiomics features to assess the inter-observer agreement. The ICC formula was applied with a two-way random effects model, absolute agreement, and a single rater or measurement approach, following the ICC selection process outlined by Koo et al[1], The ICC values for each feature were computed as follows:

ICC =

Features with ICC > 0.75 were deemed reliable and retained for model construction, resulting in 712 features with excellent agreement (ICC > 0.75). Additionally, segmentation consistency was quantified using the Dice similarity coefficient (DSC), yielding a mean DSC of 0.72, indicating high agreement between the two neuroradiologists.

**Section 3: Selection of the most stable ML algorithm**

This study deep learning model, hematoma radiomics model, radiomics model of perihematoma edema, clinical imaging sign model, predictive models employing several machine-learning algorithms, including KNN, AdaBoost, GradientBoosting, and LightGBM were constructed. Following a series of comparative analyses, Choose the KNN algorithm as the most stable to construct a machine model.(Table S1).

**Table S1** Comparison of machine learning algorithms for training

|  | **model_name** | **Accuracy** | **AUC** | **Sensitivity** | **Specificity** | **Task** |
| --- | --- | --- | --- | --- | --- | --- |
| 0 | KNN | 0.853 | 0.909 | 0.279 | 0.984 | label-train |
| 1 | KNN | 0.846 | 0.715 | 0.179 | 0.979 | label-test |
| 2 | AdaBoost | 0.892 | 0.940 | 0.581 | 0.963 | label-train |
| 3 | AdaBoost | 0.799 | 0.639 | 0.250 | 0.908 | label-test |
| 4 | GradientBoosting | 0.879 | 0.993 | 0.349 | 1 | label-train |
| 5 | GradientBoosting | 0.831 | 0.683 | 0 | 0.996 | label-test |
| 6 | LightGBM | 0.853 | 0.983 | 0.209 | 1 | label-train |
| 7 | LightGBM | 0.828 | 0.689 | 0.018 | 0.989 | label-test |

**References:**

1. Koo, T. K., & Li, M. Y. (2016). A Guideline of selecting and Reporting Intraclass correlation coefficients for Reliability research. *Journal of Chiropractic Medicine*, *15*(2), 155–163. <https://doi.org/10.1016/j.jcm.2016.02.012.>
